# Supplementary material for: An insilico design of a peptide bioreceptor for cortisol using molecular modelling techniques
Source: Research Square preprint supplement (doi:10.21203/rs.3.rs-3567216/v1), 2023-11-09
Supplement: Supplementary file 1 [file 2544e22f26650e71f1d5465d.docx]

**Supplementary Information**

**An *insilico* design of a peptide bioreceptor for cortisol using molecular modelling techniques**

Parijat Deshpande1,2 Debankita De1 Yogesh Badhe1 Siddharth Tallur3 Debjani Paul4 and Beena Rai1

1 TCS Research, Tata Research Development & Design Centre (TRDDC), Pune 411013, India

2Centre for Research in Nanotechnology & Science (CRNTS), IIT Bombay, Mumbai 400076, India.

3Department of Electrical Engineering, IIT Bombay, Mumbai 400076, India.

4Department of Biosciences and Bioengineering, IIT Bombay, Mumbai 400076, India.

**E-mail: parijat.deshpande@tcs.com**

This supplementary information provides interaction diagrams and conformation renderings for various candidate proteins from protein database1 for design of baseline peptide bioreceptor.

1. **High throughput screening using molecular docking**

Table SI 1: AutoDock Vina screening of various top candidate protein

| **Candidate Protein PDB IDs** | **Binding Energy kcal/ mol** | **Docking Plot** | **Interaction Diagram** |
| --- | --- | --- | --- |
| *6NWL* | *-12.36* | *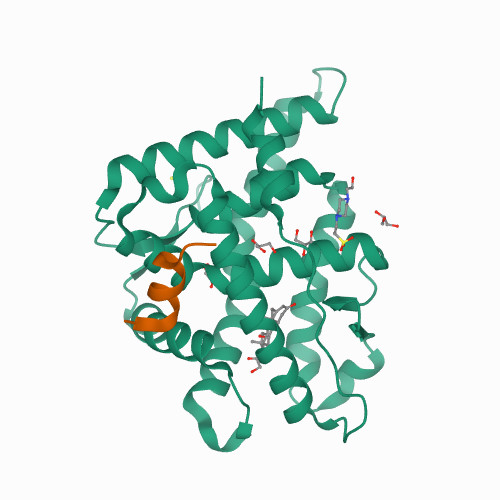* | *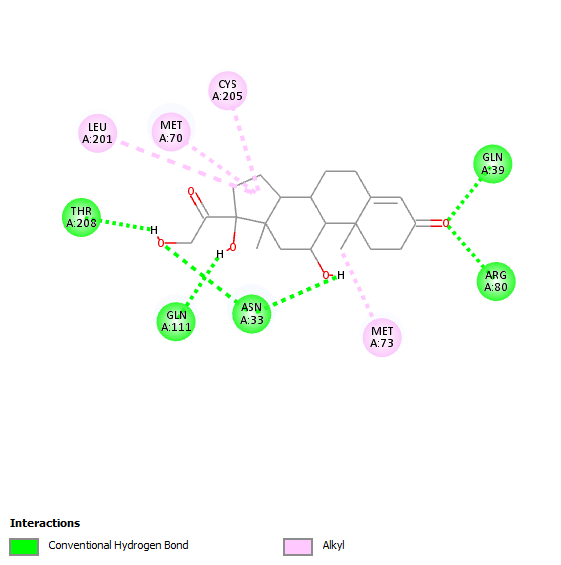* |
| *2V95* | *-9.67* | 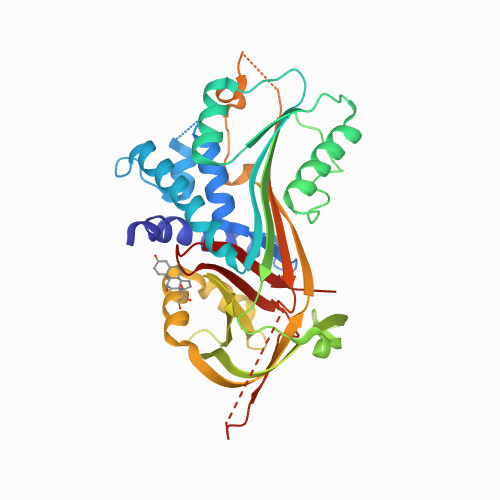 | 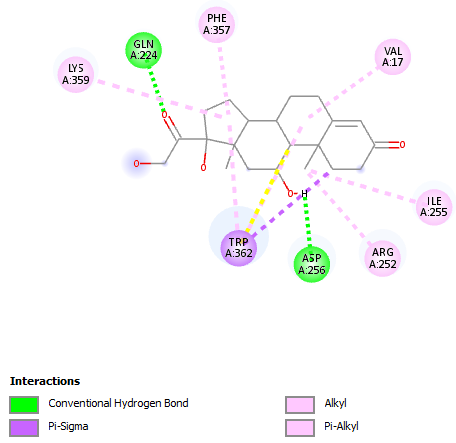 |
| *2VDY* | *-9.28* | *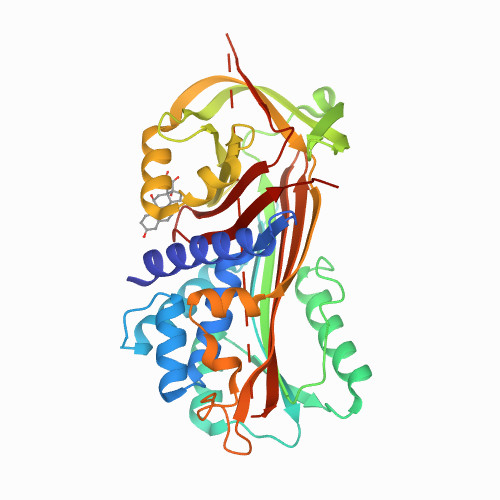* | *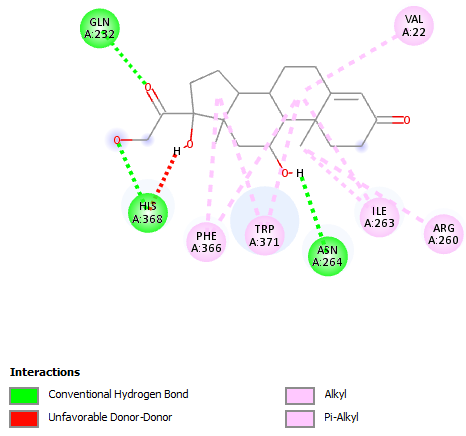* |
| *NewBG – III*  *(Alpha1-antichymotrypsin variant)* | *-7.72* | *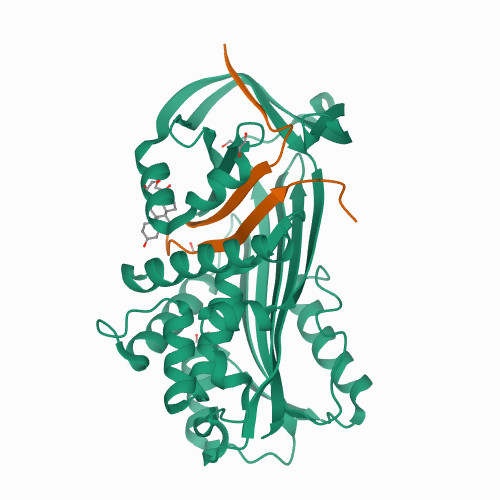* | *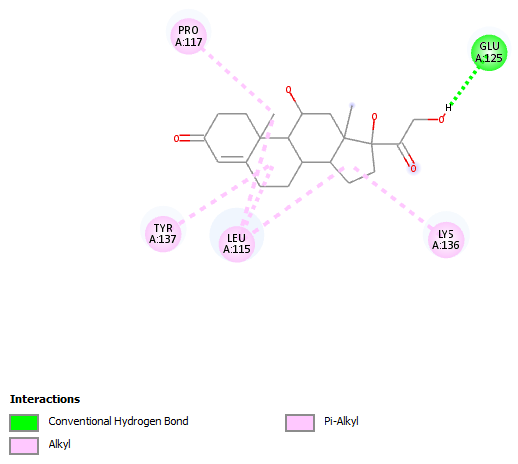* |
| *6HGG* | *-7.7* | *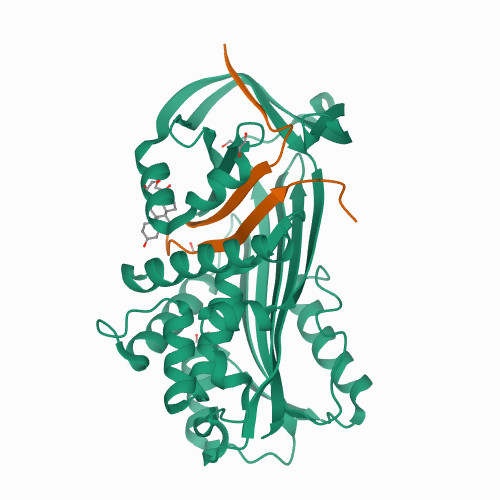* | *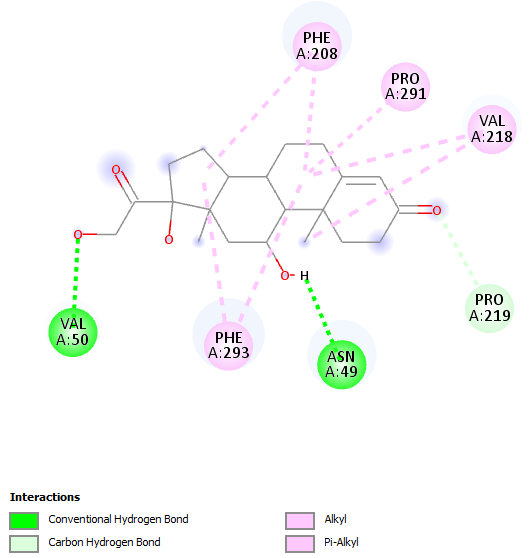* |
| *6HGC*  *Serpin* | *-9.11* | *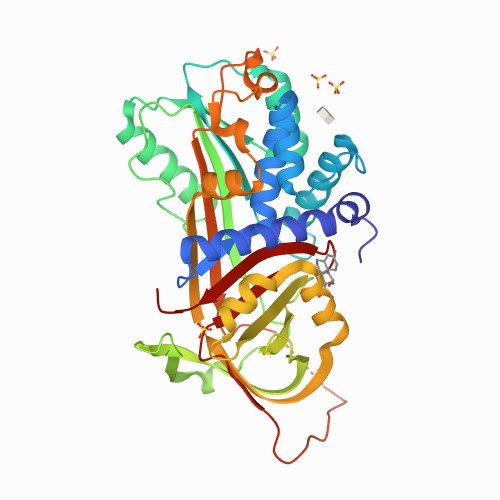* | *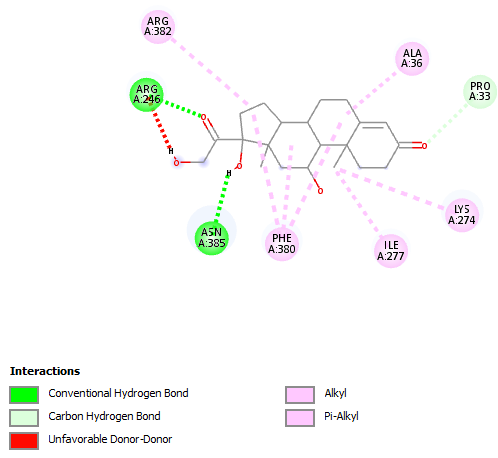* |
| *6ITP*  *VHH Antibody* | *-8.32* | *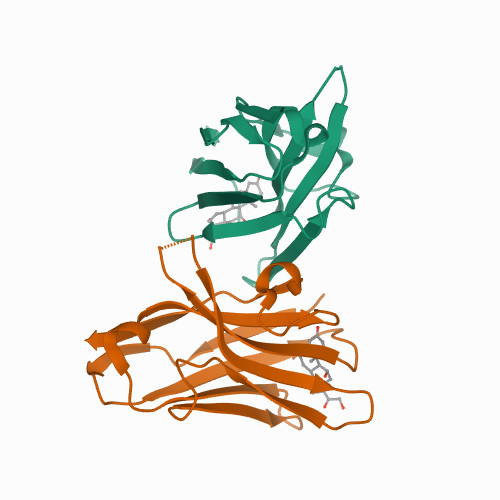* | *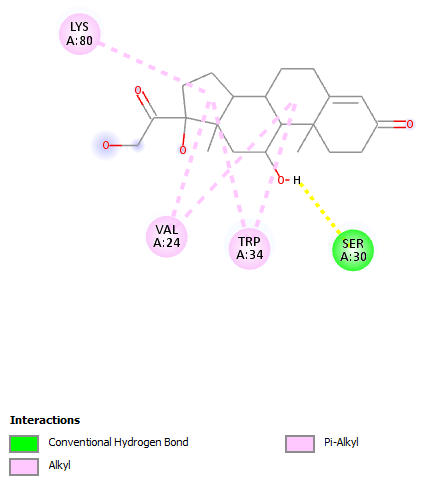* |
|  |  |  |  |

| 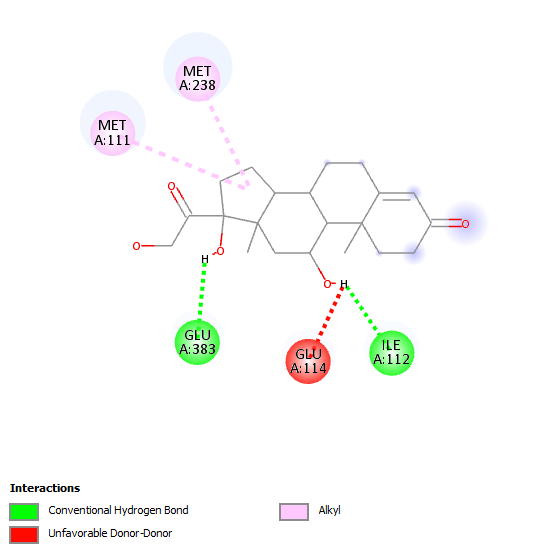 | 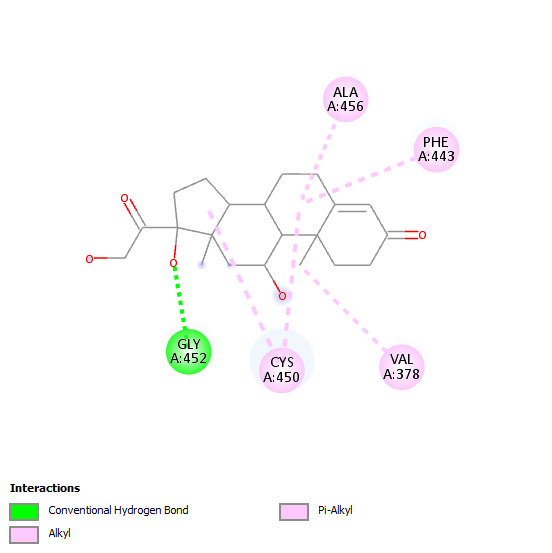 |
| --- | --- |
| PDB: 6XZ8 BE: -6.51 kcal/mol | PDB: 6XZ9 BE: -5.93 kcal/mol |
| 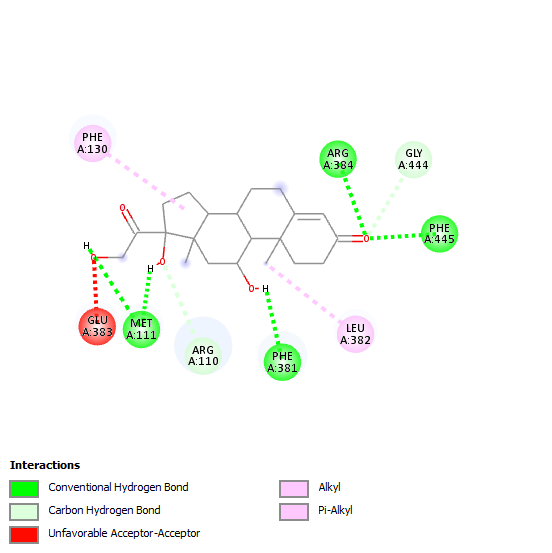 | 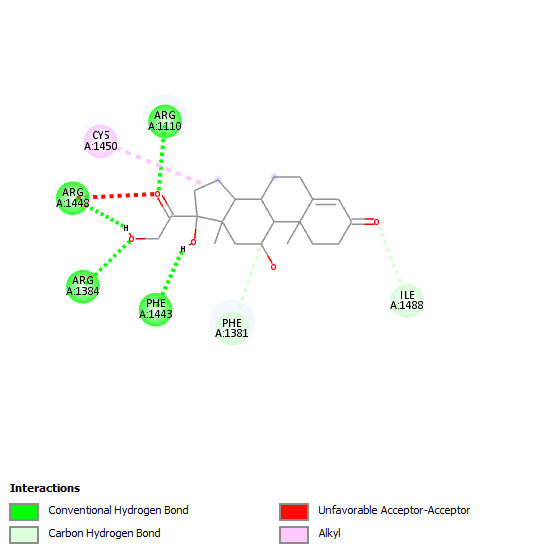 |
| PDB: 7E7F BE: – 9.56 kcal/mol | PDB: 7M8I BE: -8.12 kcal/mol |
| 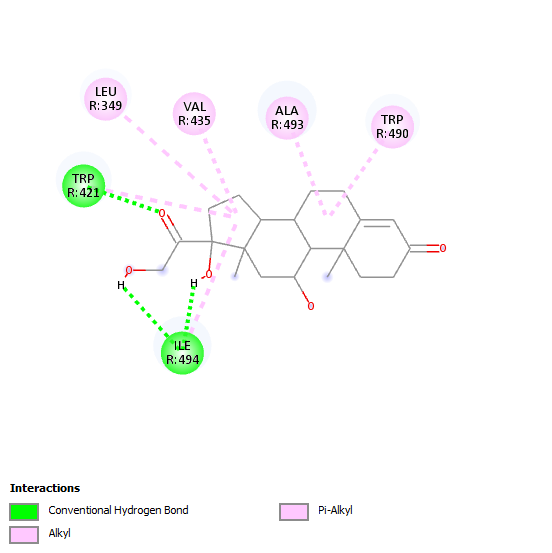 | 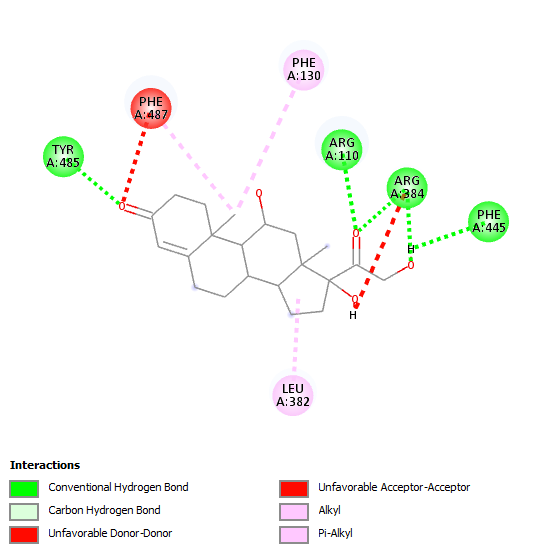 |
| PDB: 7D77 BE – 8.44 kcal/mol | PDB: 7M8V BE -10.5 kcal/mol |
| 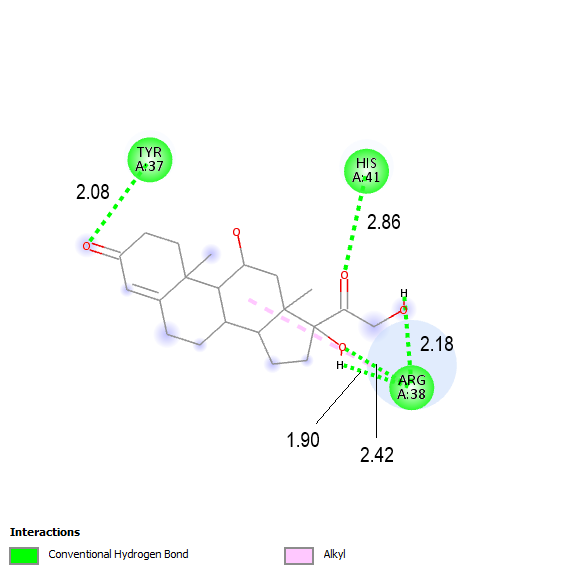 | 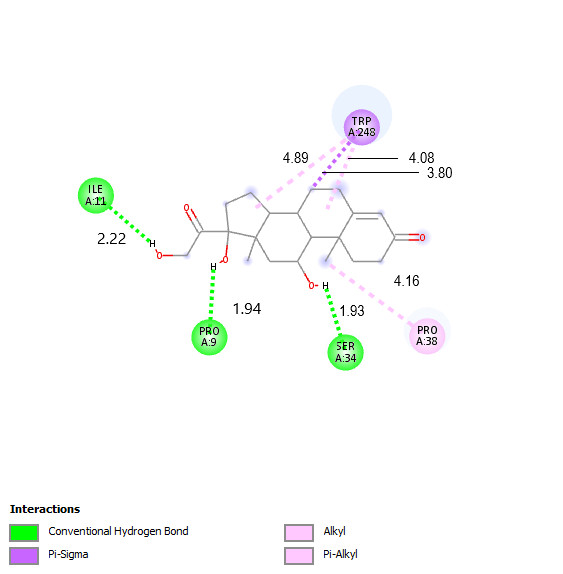 |
| PDB: 6P9X BE: -6.12 kcal/mol | PDB: 5BK8 BE: – 4.87 kcal/mol |
| 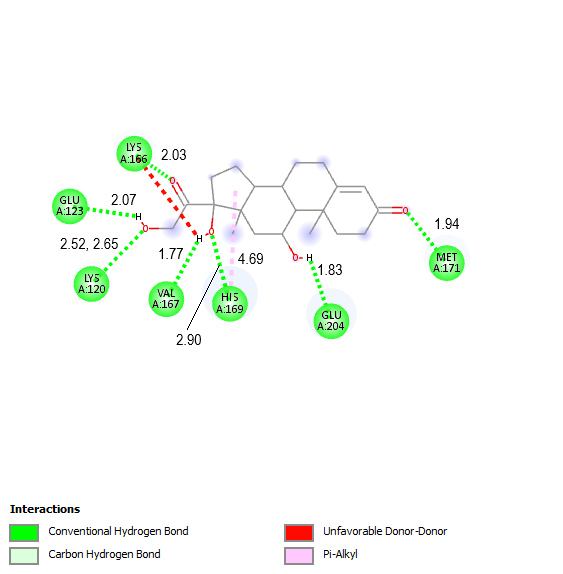 | 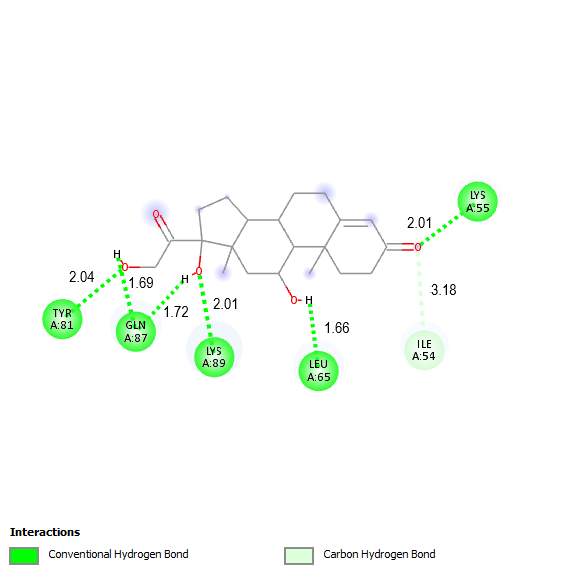 |
| PDB: 6R5G BE: -5.38 kcal/mol | PDB: 6ROY BE: -7.92 kcal/mol |
| 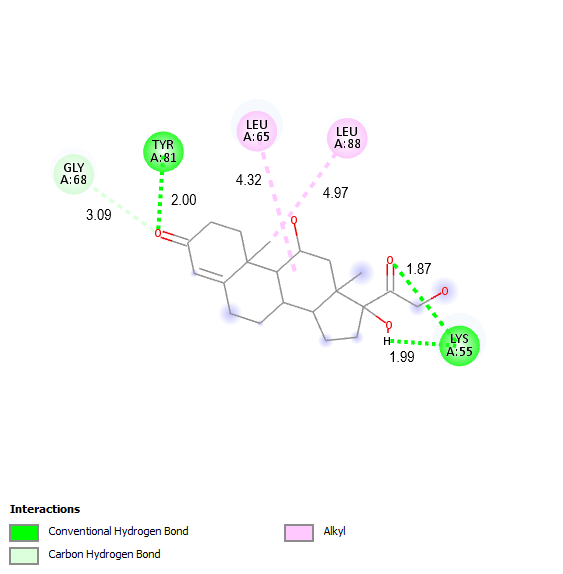 | 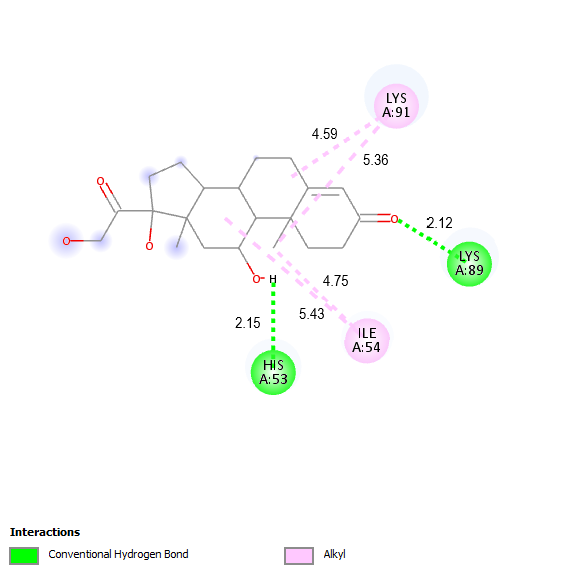 |
| PDB: 6ROZ BE: -8.00 kcal/mol | PDB: 6WU8 BE: -6.13 kcal/mol |
| 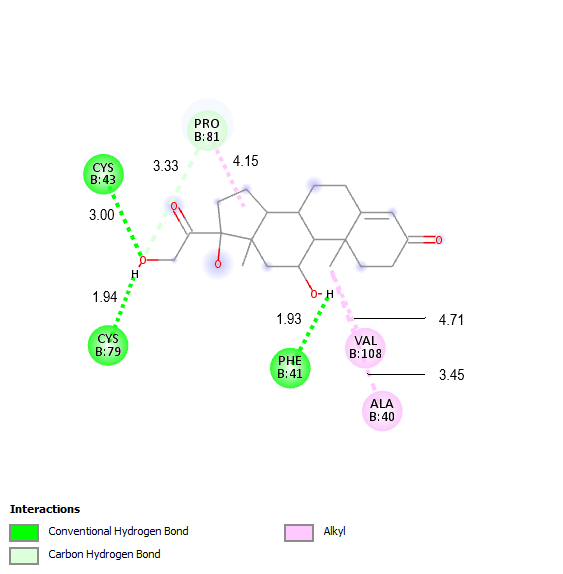 | 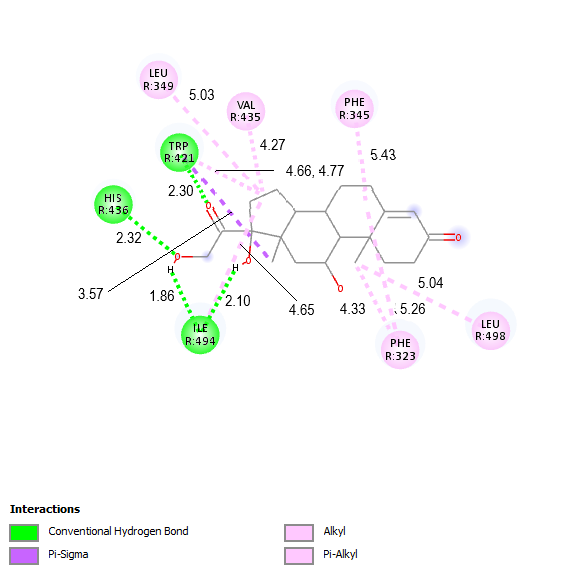 |
| PDB: 7AGO BE: -6.33 kcal/mol | PDB: 7D76 BE: -6.86 kcal/mol |
| 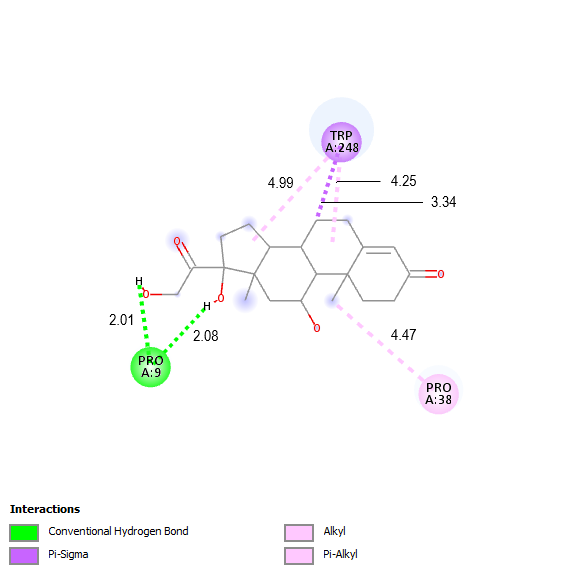 | 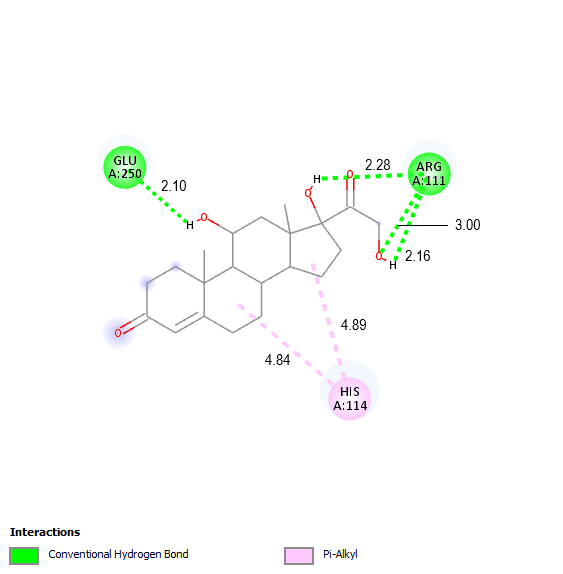 |
| PDB: 7EMN BE: -5.19 kcal/mol | PDB: 7JVM BE: – 7.18 kcal/mol |
| 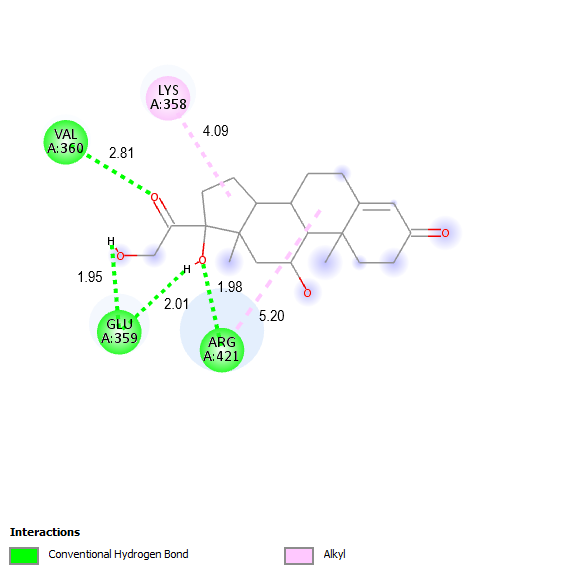 | 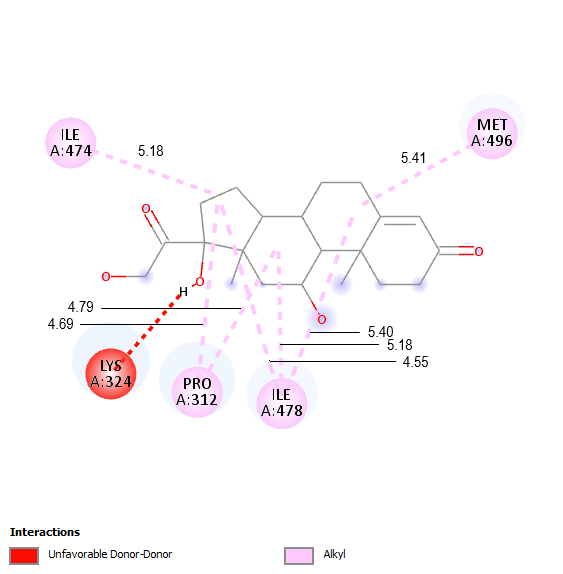 |
| PDB: 7JVN BE: -4.91 kcal/mol | PDB: 7R7D BE: -4.7 kcal/mol |
| 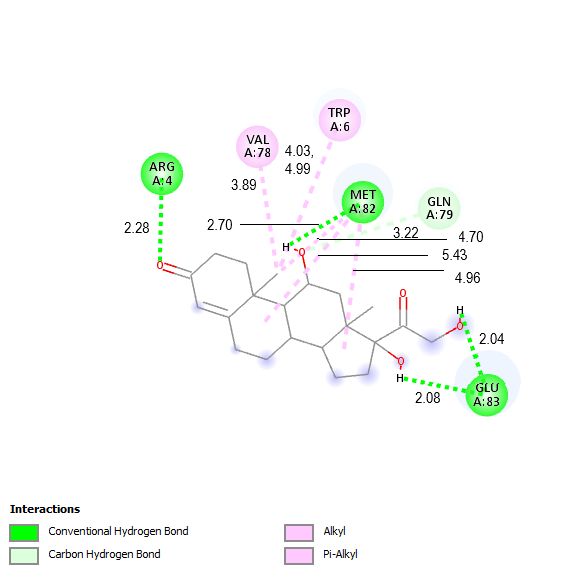 | 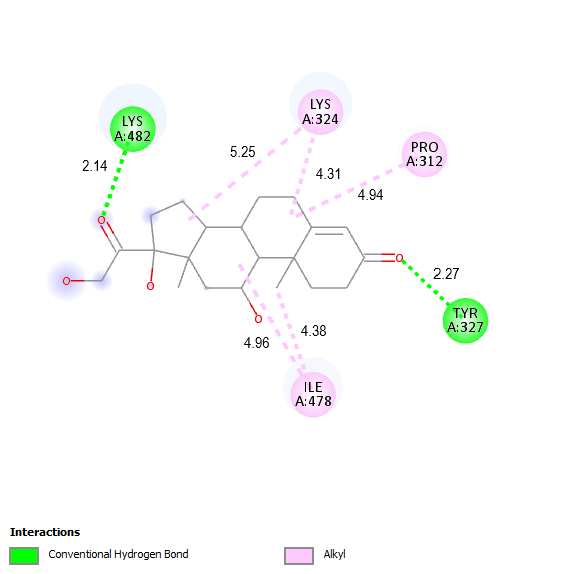 |
| PDB: 7R7I BE: -4.35 kcal/mol | PDB: 7R7L BE: -4.92 kcal/mol |
| 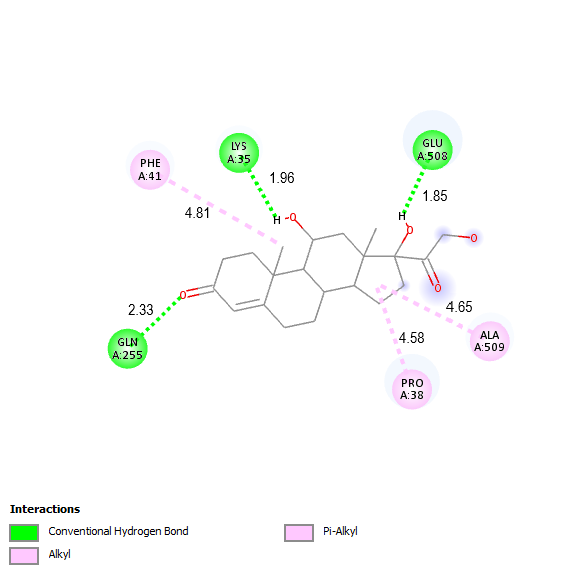 | 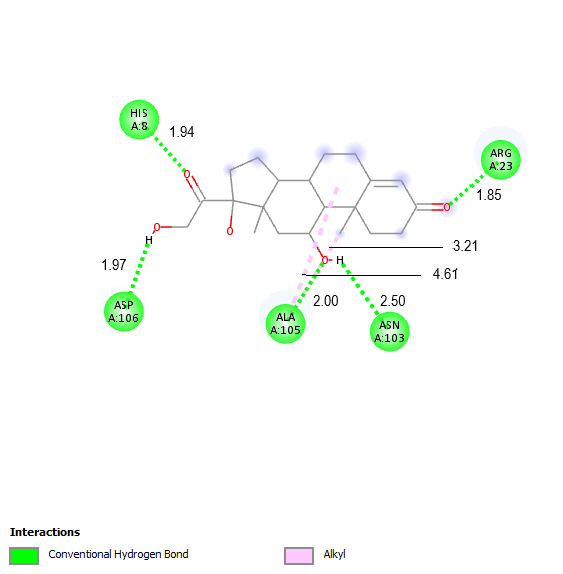 |
| PDB: 7R75 BE: -8.05 kcal/mol | PDB: 7RCT BE: -6.68 kcal/mol |
| 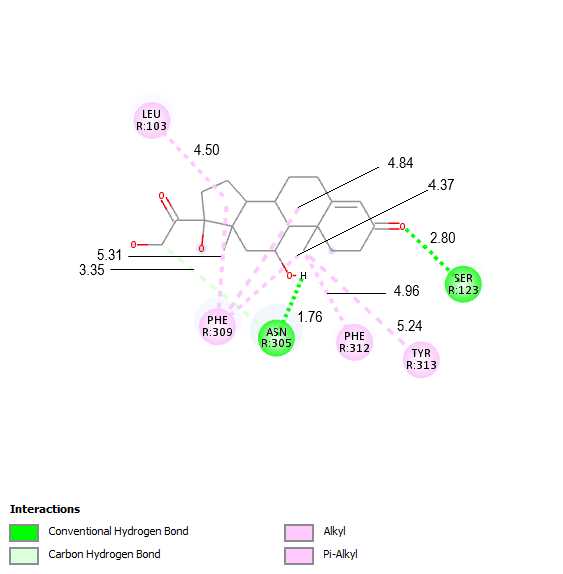 | 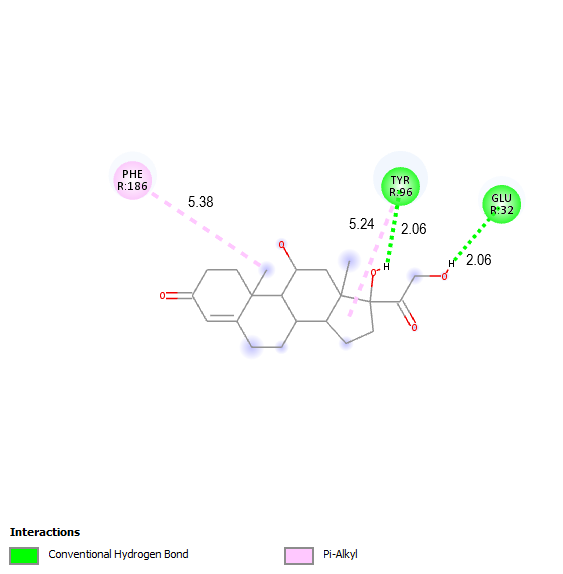 |
| PDB: 7W2Z BE: -7.81 kcal/mol | PDB: 7WQ3 BE: -5.01 kcal/mol |
| 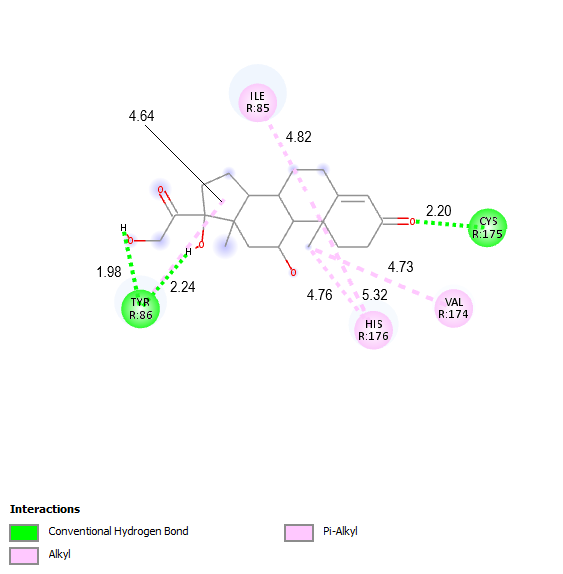 | 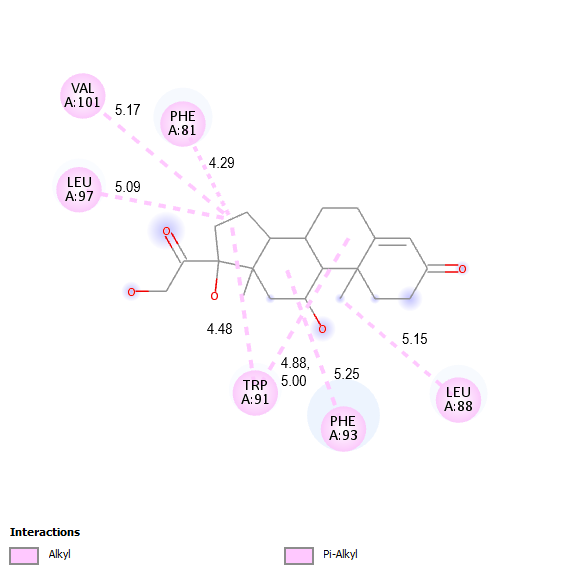 |
| PDB: 7WQ4 BE: -5.66 kcal/mol | PDB: 7XBD BE: -5.22 kcal/mol |

1. **Similarity assessment using Basic Local Alignment Search Tool (BLAST)2**

These proteins were further compared for their similarities via the NCBI (National Library of Medicine) online server Basic Local Alignment Search Tool (BLAST)2 method and found to have > 75% similarity altogether especially in their active binding sites for the intended target ligand cortisol.

FASTA format – input sequence

>2V95_1|Chain A|Peptide

CQLIQMDYVGNGTAFFILPDQGQMDTVIAALSRDTIDR


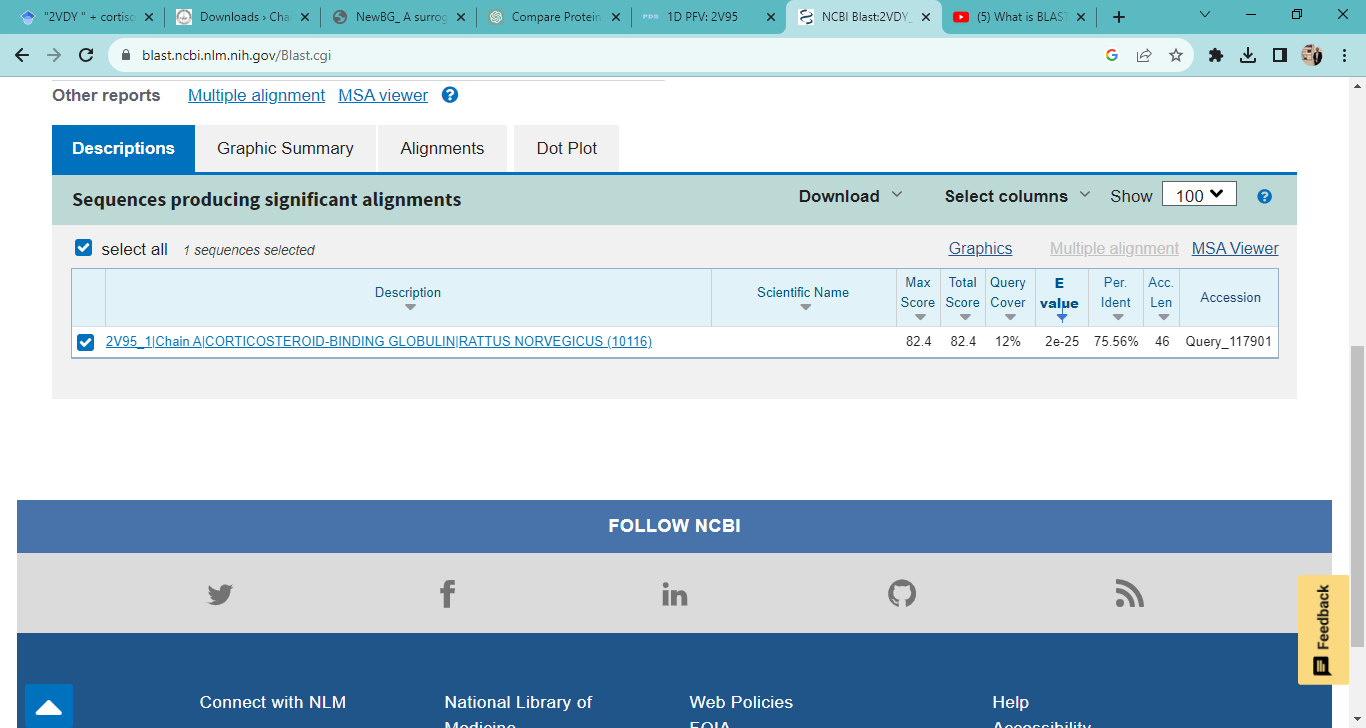


**Figure S1** Sequence comparison between Corticosteroid-Binding Globulin PDB ID 2V95 and peptide demonstrating similarity


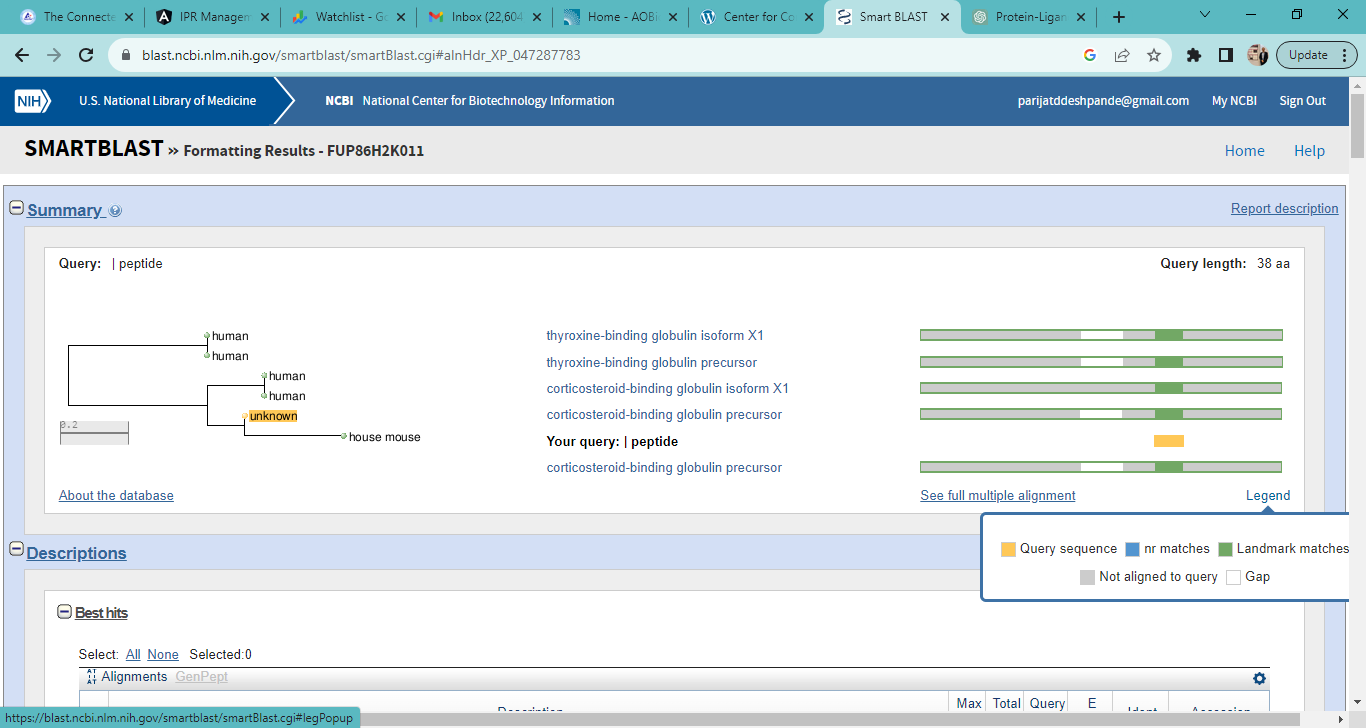


**Figure S2** Baseline peptide compared with other proteins from database using smart BLAST

1. **Hydrophobicity of the baseline peptide as computed using Pep-Calc**5.


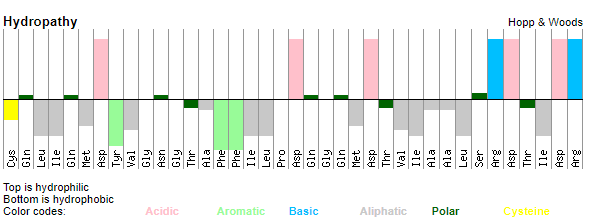


**Figure S3:** Hydrophobicity and hydrophilicity of the baseline peptide bioreceptor using Pep-Calc5

1. **Molecular modelling of native protein 2V95 using GROMACS**

| **A** |  |
| --- | --- |
| B |  |
| C |  |
| D |  |

**Figure S4:** Intermediate molecular modelling plots for assessing (A) RMSD, (B) Radius of gyration, and (C) Compute WHAM4 (D) Binding affinity of cortisol with 2V95 in eccrine sweat solution using umbrella sampling3 and PMF

1. **Iterative development protocol of baseline peptide and comparison with Corticosteroid-Binding Globulins**

Table SI 2: Interaction diagrams of candidate peptides compared with RAT, PIG, HUMAN CBGs

| Candidate Peptides – Single letter representation of AAs | Docked structure with lowest binding energy | Interaction Diagram |
| --- | --- | --- |
| Peptide # 1 QMDYVGNGTAFFILPDQGQMDTVIALSRDTIDILE | 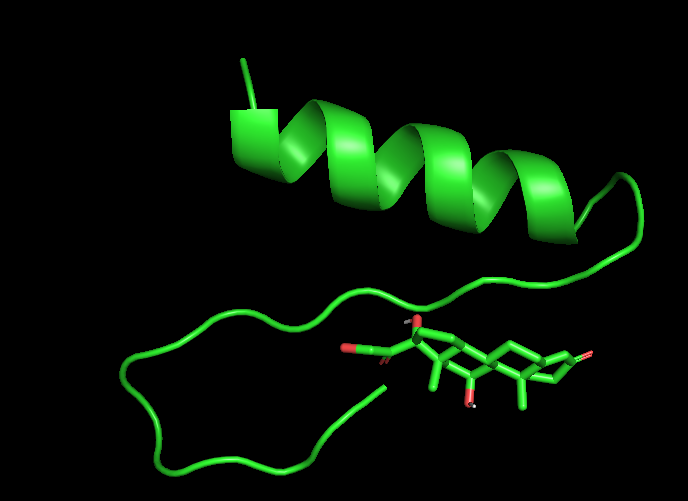 | 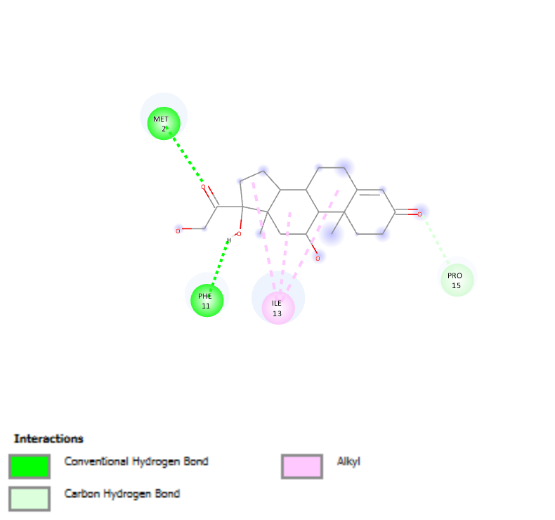 |
|  | Peptide - #1 – 34AA sequence  Number of conformations = 50  Number of distinct conformational clusters found = 18  Cluster with lowest BE = -5.48 kcal/ mol has 7 conformations with a mean BE of -4.89 kcal/ mol  Cluster with highest number of conformations (=9) has lowest BE = -3.98 kcal/mol with a mean BE = -3.81 kcal/ mol | |
| Peptide #2  LIQMDYVGNGTAFFILPDQGQMDTVIALSRDTIDRW | 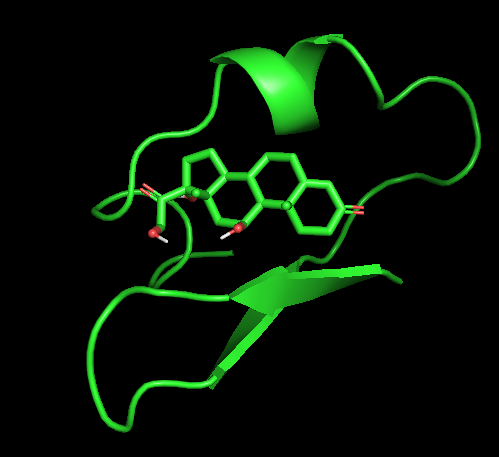 | 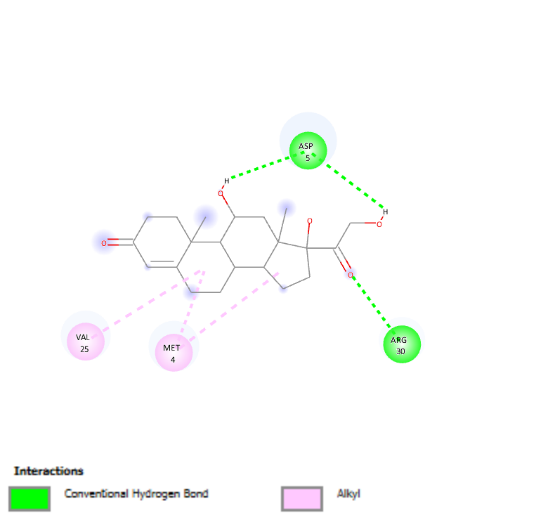 |
|  | Peptide - #2 – 35AA sequence  Number of conformations = 10  Number of distinct conformational clusters found = 4  Cluster with lowest BE = -6.38 kcal/ mol has 7 conformations with a mean BE of -4.89 kcal/ mol has largest population  The residues GLN224 and ASP256 from the original 2V95 protein do not participate in the interaction with Cortisol, although the lowest BE increases. The peptide structure also changes, it now contains beta sheet in addition to alpha helixes. | |
| Peptide #3  PCQLIQMDYVGNGTAFFILPDQGQMDTVIALSRDTIDRWGKL | 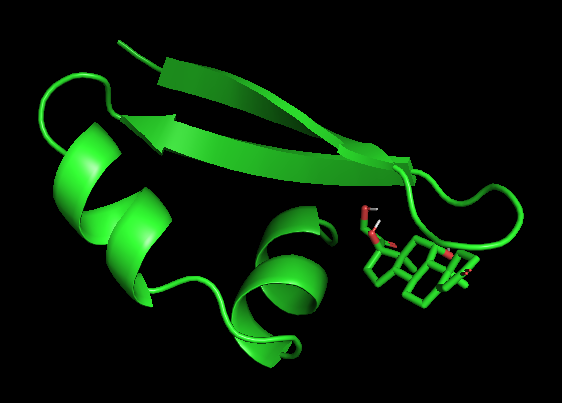 | 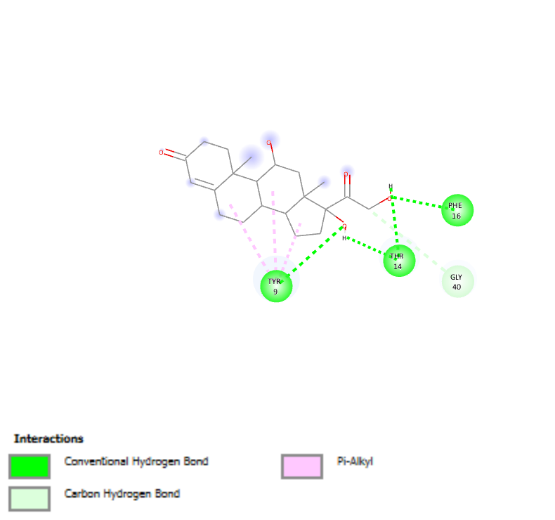 |
|  | Peptide - #3 – 41AA sequence  Number of conformations = 10  Number of distinct conformational clusters found = 2  Cluster with lowest BE = -6.69 kcal/mol has a population of 8 and a mean BE of -6.47 kcal/mol  No significant improvement at the cost of longer AA sequence | |
| RAT CBG -PCQLIQMDYVGNGTAFFILPDQGQMDTVIAALSRDTIDRWGKLMTP | 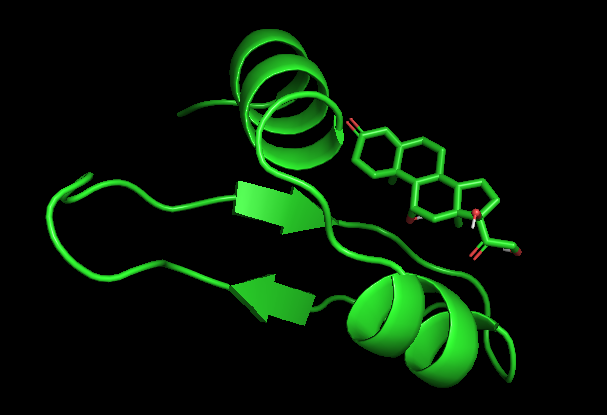 | 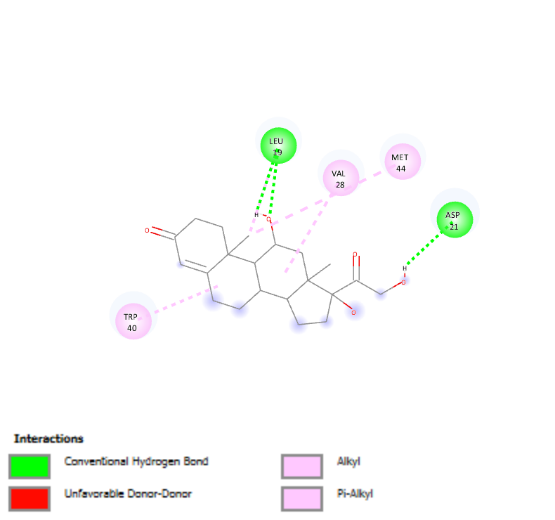 |
|  | Number of conformations = 10  Number of distinct conformational clusters found = 2  Cluster with lowest BE = -6.34 kcal/mol has a population of 3 and a mean BE of -5.80 kcal/mol | |
| PIG CBG - PCQLVQLEYTGNETAFFILPVKGEMDTVIAGLSRDTIQRWSKSLIP | 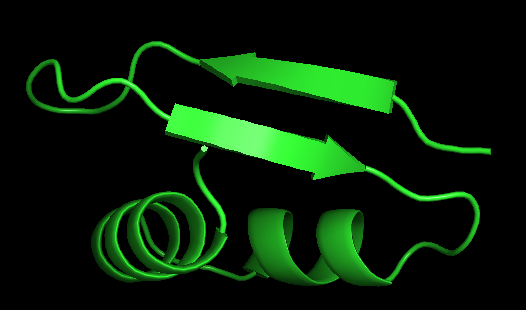 | 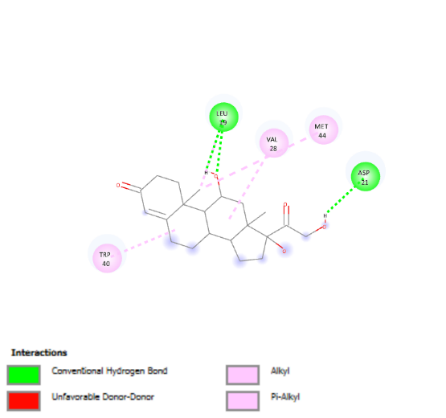 |
|  | Number of conformations = 10  Number of distinct conformational clusters found = 2  Cluster with lowest BE = -4.61 kcal/mol has a population of 6 and a mean BE of -4.61 kcal/mol | |
| HUMAN CBG - PCQLVQMNYVGNGTVFFILPDKGKMNTVIAALSRDTINRWSAGLTS | 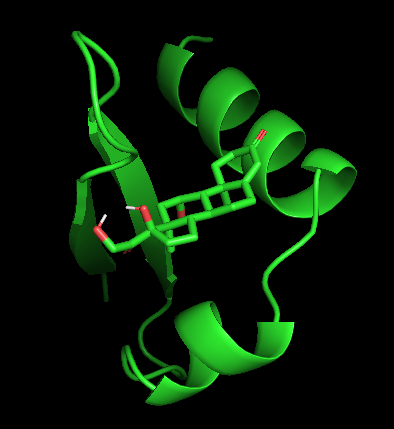 | 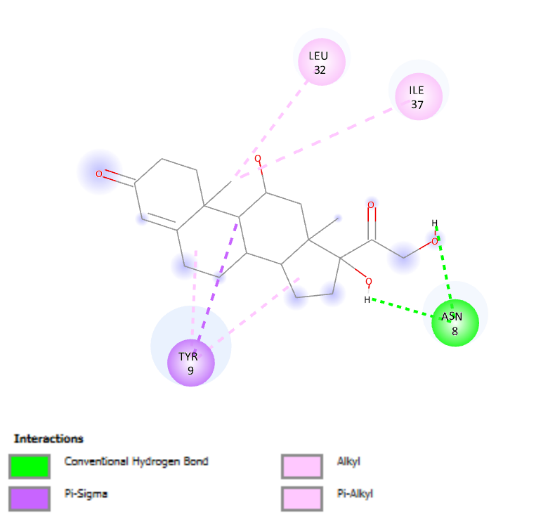 |
|  | Number of conformations = 10  Number of distinct conformational clusters found = 4  Cluster with lowest BE = -6.42 kcal/mol has a population of 6 and a mean BE of -5.82 kcal/mol | |
| Peptide with CYS at N-terminus  CQLIQMDYVGNGTAFFILPDQGQMDTVIALSRDTIDR | 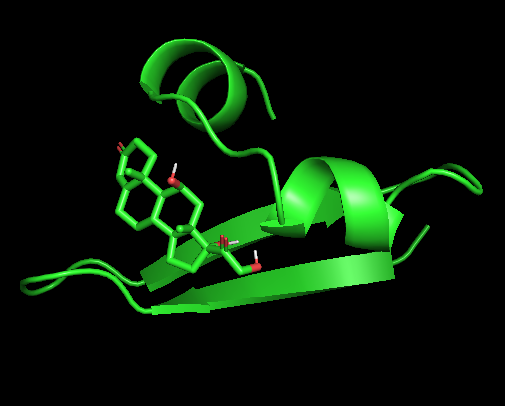 | 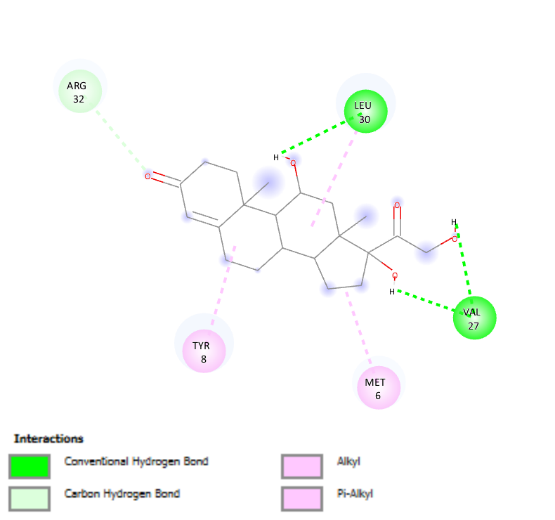 |
|  | Peptide – Candidate baseline bioreceptor for cortisol – 37AA sequence  Number of conformations = 10  Number of distinct conformational clusters found = 4  Cluster with lowest BE = -6.45 kcal/mol has a population of 6 and a mean BE of -5.82 kcal/mol | |

**References:**

1. RCSB PDB: Homepage. https://www.rcsb.org/.

2. Boratyn, G. M. *et al.* *Domain enhanced lookup time accelerated BLAST*. (2012).

3. Badhe, Y., Gupta, R. & Rai, B. In silico design of peptides with binding to the receptor binding domain (RBD) of the SARS-CoV-2 and their utility in bio-sensor development for SARS-CoV-2 detection. *RSC Adv* **11**, 3816–3826 (2021).

4. Rosenberg, J. M. *et al.* *The weighted histogram analysis method for free-energy calculations on biomolecules The Weighted Histogram Analysis Method for Free-Energy Calculations on Biomolecules. I. The Method*. https://www.researchgate.net/publication/200147620 (1992).

5. Lear, S. & Cobb, S. L. Pep-Calc.com: A set of web utilities for the calculation of peptide and peptoid properties and automatic mass spectral peak assignment. *J Comput Aided Mol Des* **30**, 271–277 (2016).
