# Supplementary material for: An insilico design of a peptide bioreceptor for cortisol using molecular modelling techniques
Source: Research Square preprint supplement (doi:10.21203/rs.3.rs-3567216/v1), 2023-11-09
Supplement: Supplementary file 2 [file 7770c72f1115f6b65f3f4dcd.docx]

Table 2: AutoDock Vina screening of various top candidate proteins

| ***Candidate Protein PDB IDs*** | ***Binding Energy kcal/ mol*** | ***Docking Plot*** | ***Interaction Diagram*** |
| --- | --- | --- | --- |
| *6NWL* | *-10.75* | *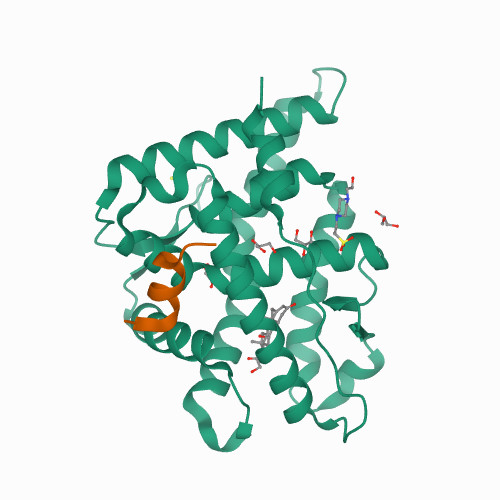* | *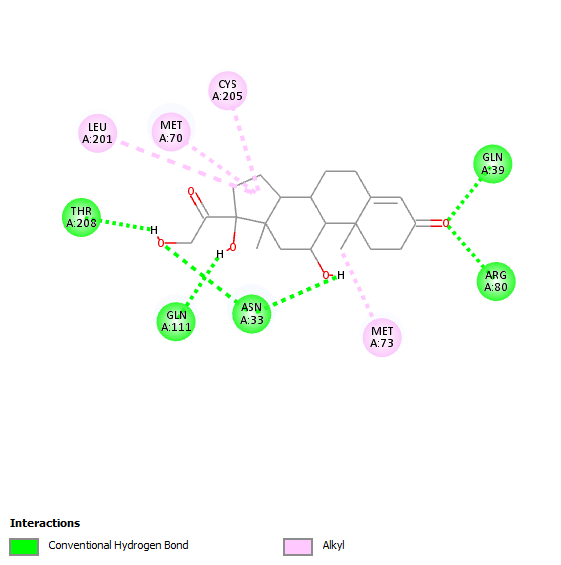* |
| *2V95* | *-9.67* | 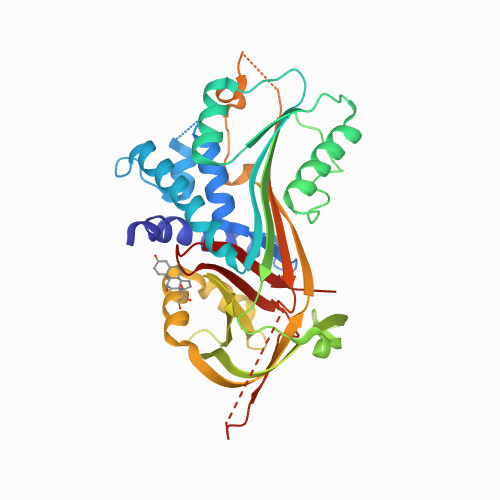 | 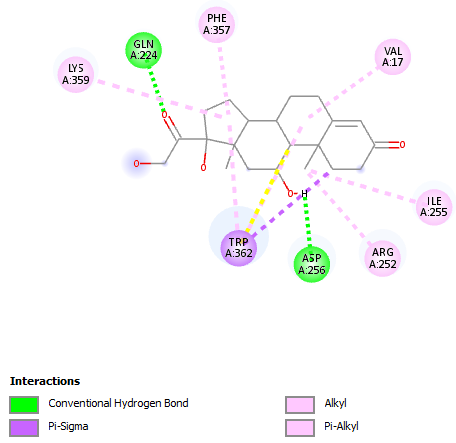 |
| *2VDY* | *-9.28* | *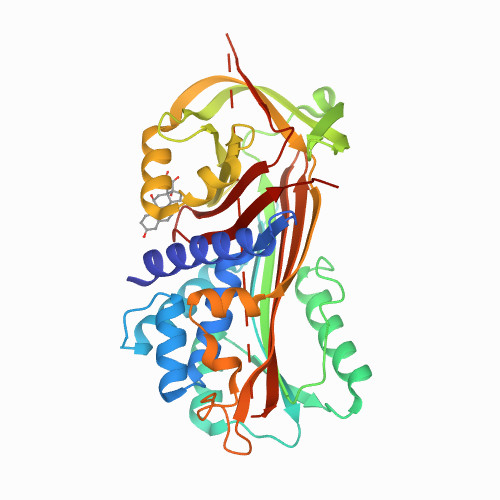* | *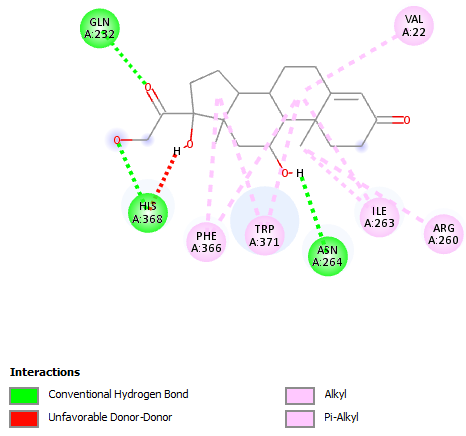* |

Table 3: Interaction diagrams of baseline peptide compared with glucose and progesterone

| 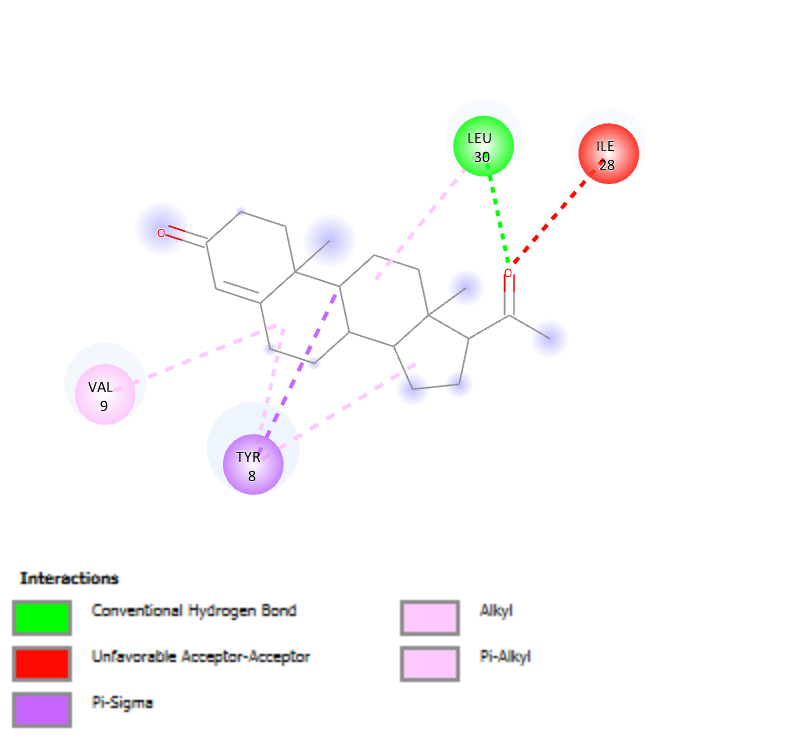 | 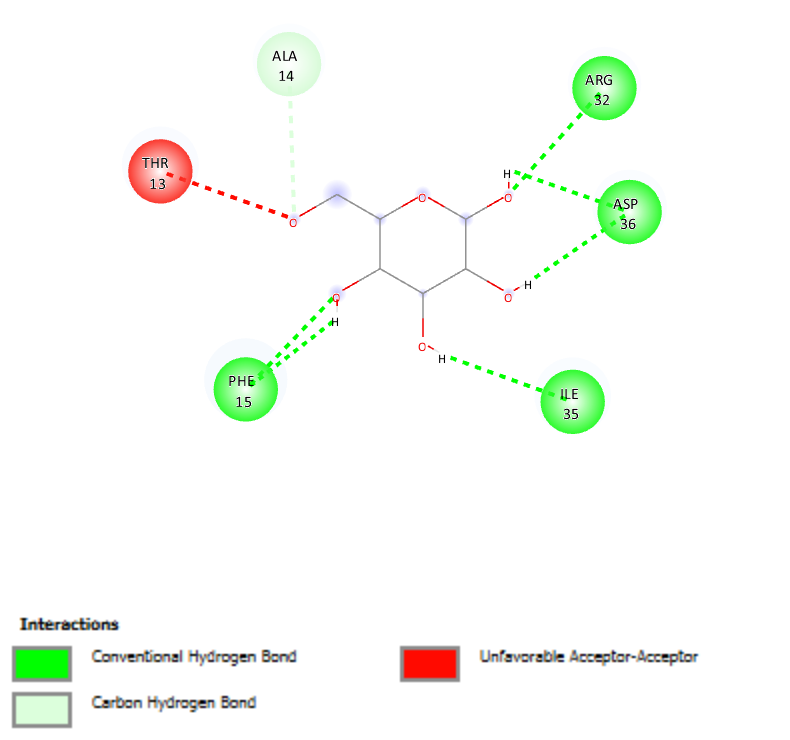 |
| --- | --- |
| Progesterone – BE: -5.38 kcal/mol | Glucose – BE: -3.34 kcal/mol |
